# Supplementary material for: Hepatitis C Virus Reveals a Novel Early Control in Acute Immune Response
Source: PubMed Central journal article supplement (PMC3192838; doi:10.1371/journal.ppat.1002289), 2011-10-13
Supplement: ppat.1002289.s011.pdf [file ppat.1002289.s011.pdf]

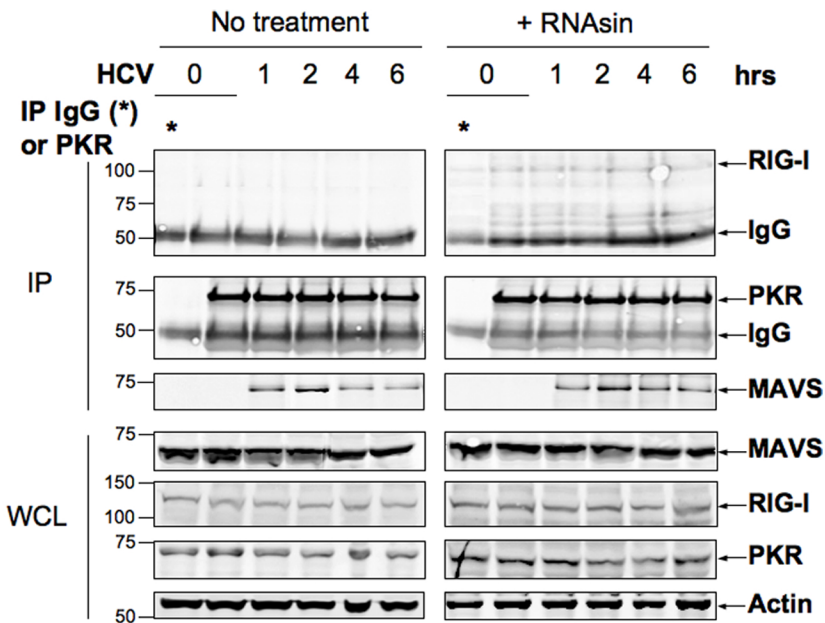

**Fig S11**
